# Supplementary material
Source: PubMed Central journal article supplement (PMC7133442)
Supplement: Supp_Data.pdf [file Supp_Data.pdf]

## Supplementary Data

Subject Number \_\_\_\_\_

Date \_\_\_\_\_

Please answer the following questions using this scale:

|                    |   |                  |   |   |              |   |
|--------------------|---|------------------|---|---|--------------|---|
| 1                  | 2 | 3                | 4 | 5 | 6            | 7 |
| Not at<br>all true |   | Somewhat<br>true |   |   | Very<br>true |   |

1) I enjoyed playing these games very much.

1 2 3 4 5 6 7

2) It was important to me to do well at these games.

1 2 3 4 5 6 7

3) I tried very hard on this activity.

1 2 3 4 5 6 7

4) I think I am pretty good at playing these games.

1 2 3 4 5 6 7

5) I would be willing to play these games again because they have some value to me.

1 2 3 4 5 6 7

6) I put a lot of effort into playing these games

1 2 3 4 5 6 7

7) I believe that playing these games could be of some value to me.

1 2 3 4 5 6 7

8) I am satisfied with my ability to play these games

1 2 3 4 5 6 7

9) This was an activity that I could not do very well.

1 2 3 4 5 6 7

10) I think this is important to do because it can help me control my fingers better.

1 2 3 4 5 6 7

11) I would describe these games as very interesting.

1 2 3 4 5 6 7

12) Playing these games was fun.

1 2 3 4 5 6 7
